# Supplementary material for: YAP1 facilitates the pathogenesis of psoriasis via modulating keratinocyte proliferation and inflammation
Source: Springer Nature journal article supplement (doi:10.1038/s41419-025-07521-3), 2025-03-19
Supplement: MOESM1 [file 41419_2025_7521_MOESM1_ESM.pdf]

## Supplemental Figure legends

**Figure S1 The expression of *YAP1* in healthy controls, psoriatic lesions, and non-lesional skins was analyzed using GEO database.** Analysis of *YAP1* mRNA expression in 64 normal healthy skins (NN), 58 psoriatic lesions (Involved skin lesions from psoriatic patients, PP), and 58 samples from individual-matched uninvolved skin of psoriatic patients (Uninvolved skin from psoriatic patients, PN) using the GSE13355 dataset. \*\*:  $P < 0.01$ , compared with the indicated controls.

**Figure S2. The expression of Yap1 in skin tissues derived from mouse back administrated with si-Yap1/si-CTL in the presence or absence of IMQ treatment. (a)** Representative immunohistochemistry images showing the expression of Yap1 in the skin tissues derived from different groups. Scar bar: 25  $\mu$ m. **(b)** Quantification data of Yap1 positive cells in the mouse skin samples of different groups (n=8 for each group). \*\*\*:  $P < 0.001$ , compared with the indicated controls.

**Figure S3. The expression of Stat3 and NF- $\kappa$ B in the skins of mice administrated with si-Yap1 in the presence or absence of IMQ treatment. (a)** Left panel: Representative images showing the Stat3 expression in the skin tissues derived from different groups. Scar bar: 25  $\mu$ m. Right panel: Quantification of Stat3 positive cells in the mouse skins of different groups (n=8). **(b)** Left panel: Representative images showing the NF- $\kappa$ B expression in the skin tissues from different groups. Scar bar: 25  $\mu$ m. Right panel: Quantification of NF- $\kappa$ B positive cells in the mouse skins of different groups (n=8). \*\*\*:  $P < 0.001$ , compared with the indicated controls.

**Figure S4. Effects of VP on regulating systemic immune response in IMQ-induced psoriasis mouse model. (a)** Representative pictures showing the spleen size of mice from different groups. **(b)** mRNA levels of *Il-1 $\beta$*  in the spleens derived from mice treated with VP or CTL in the presence or absence of IMQ treatment (n=8). **(c)** mRNA levels of *Il-1 $\beta$* , et al. in the lymph nodes derived from different groups (n=8 for each group). \*\*\*:  $P < 0.001$ , \*\*:  $P < 0.01$ , \*:  $P < 0.05$ , compared with the indicated controls.

# *YAP1* mRNA (GSE13355)

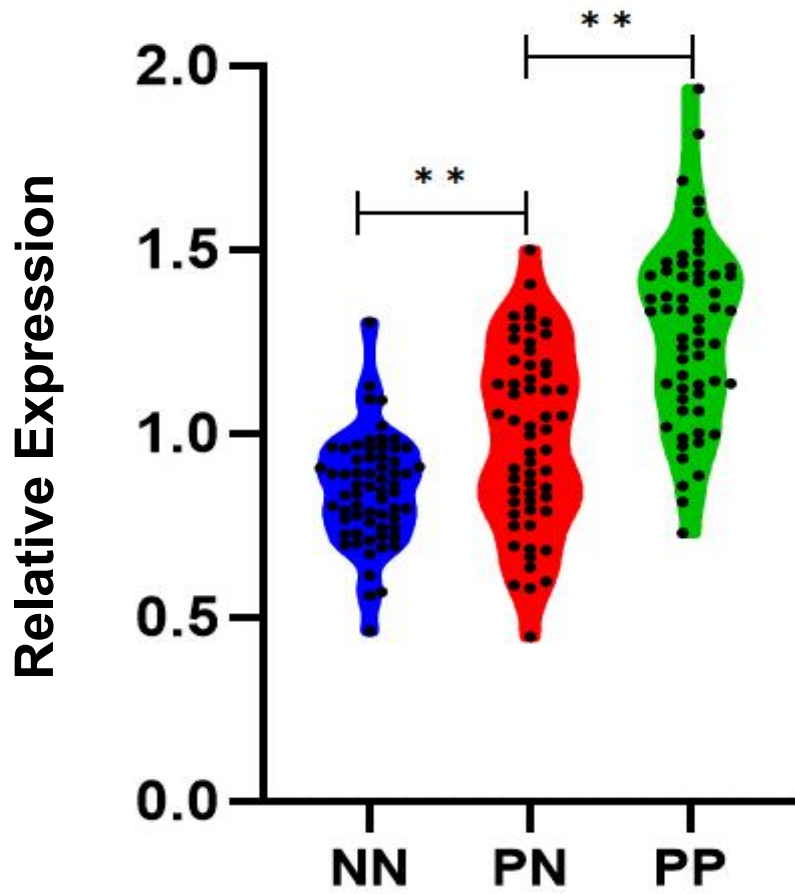

Fig. S1

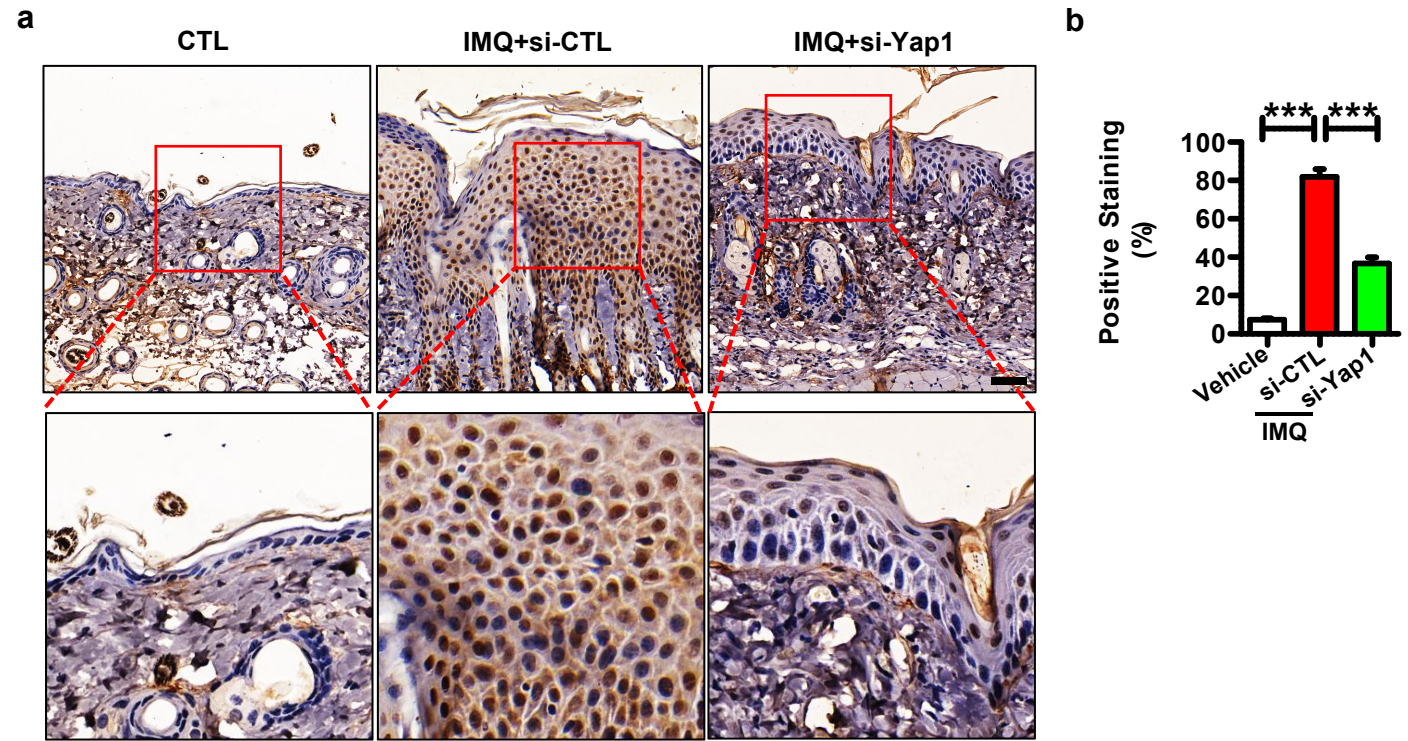

**Fig. S2**

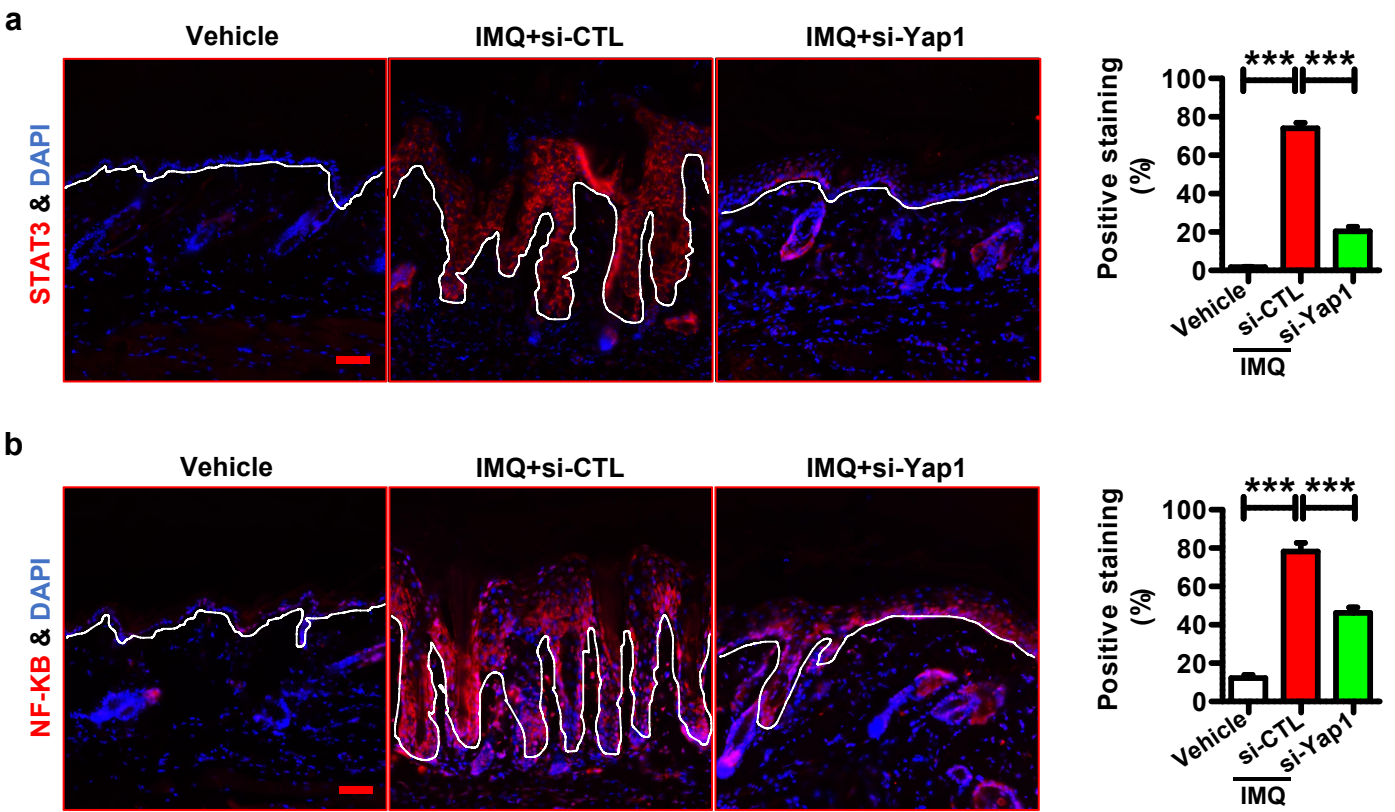

**Fig. S3**

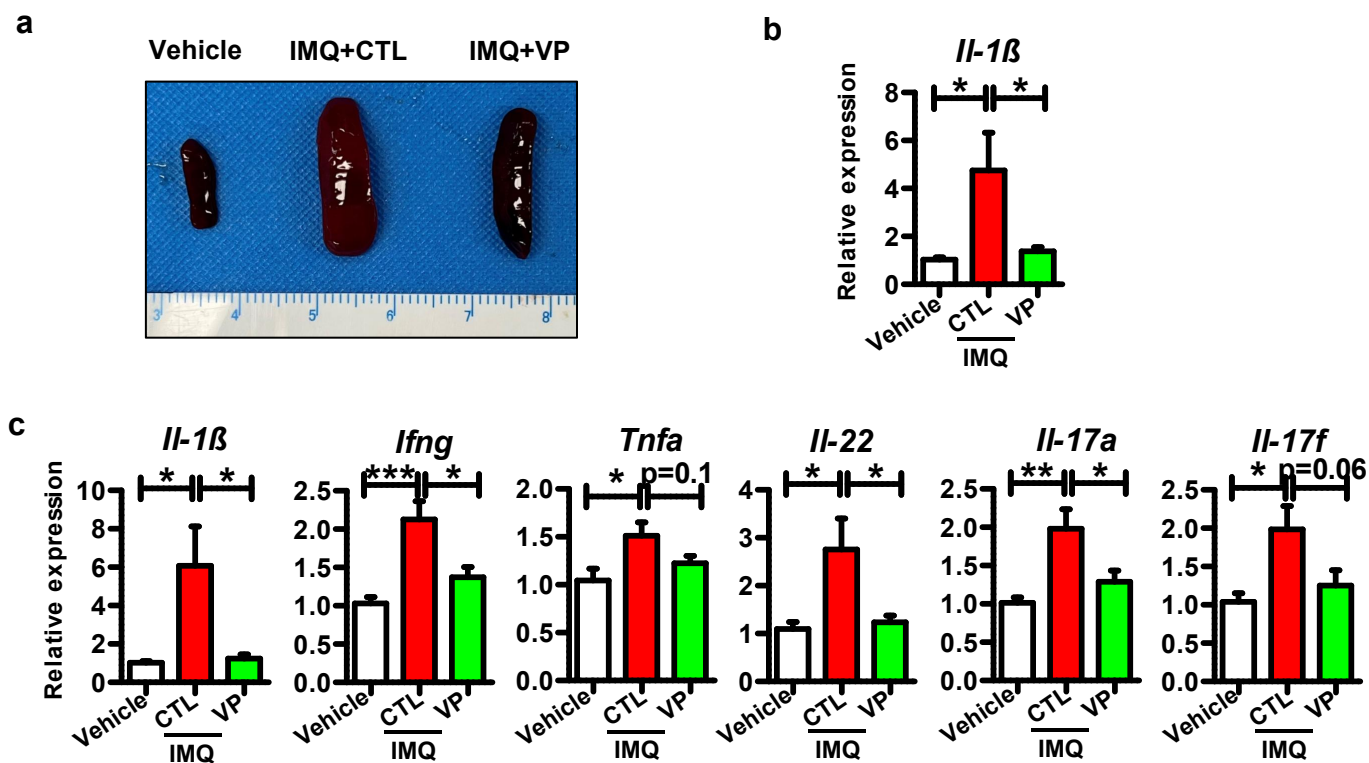

**Fig. S4**
